# Supplementary material
Source: MDPI journal article supplement (https://www.mdpi.com/2073-4441/12/8/2237)
Supplement: s1 [file s1]

# Impact of hydropower dam operation and management on downstream hydrogeomorphology in semi-arid environments (Tekeze, northern Ethiopia)

## Online supplementary figures

|   | Data provided by | Data analyzed by | Options generated by | Decision selection by | Decision implemented by | Approach to decision making         |
|---|------------------|------------------|----------------------|-----------------------|-------------------------|-------------------------------------|
| 1 | Decision maker   |                  |                      |                       |                         | Completely unsupported              |
| 2 | Database/GIS     | Decision maker   |                      |                       |                         | Information Supported               |
| 3 | Database/GIS     | DSSs             | Decision maker       |                       |                         | Systematic analysis                 |
| 4 | Database/GIS     | DSSs             |                      | Decision maker        |                         | Systematic analysis of alternatives |
| 5 | Database/GIS     | DSSs             |                      |                       | Decision maker          | System with override                |
| 6 | Database/GIS     | DSSs             |                      |                       |                         | Completely automated                |

**Figure 1** The Tekeze dam operation and management is based on an information supported decision support system (DSS): reservoir water levels are monitored but the dam operator makes all decisions (McCartney & King, 2011)

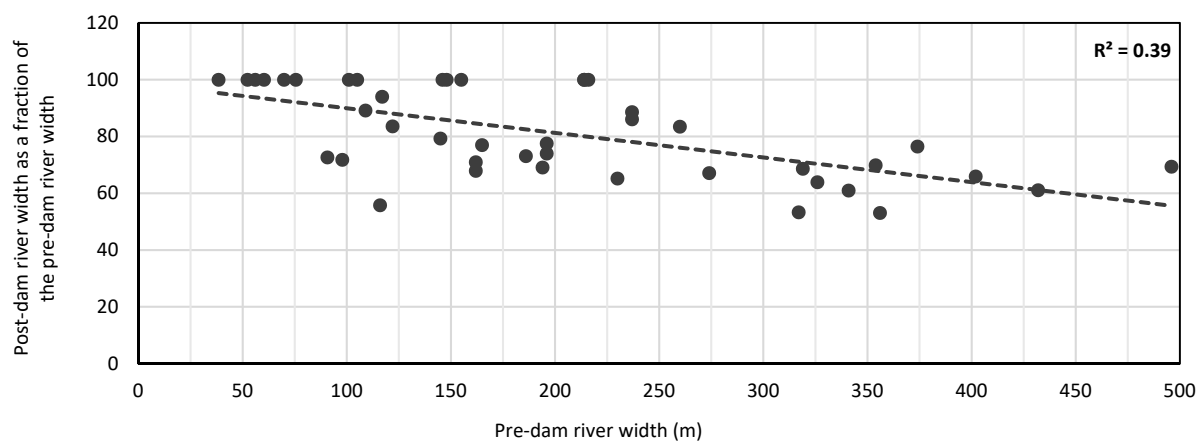

**Figure 2** The post-dam river narrowing has mainly occurred in the areas with a large pre-dam river width (unconfined areas) than in those with a smaller pre-dam river width (confined areas)

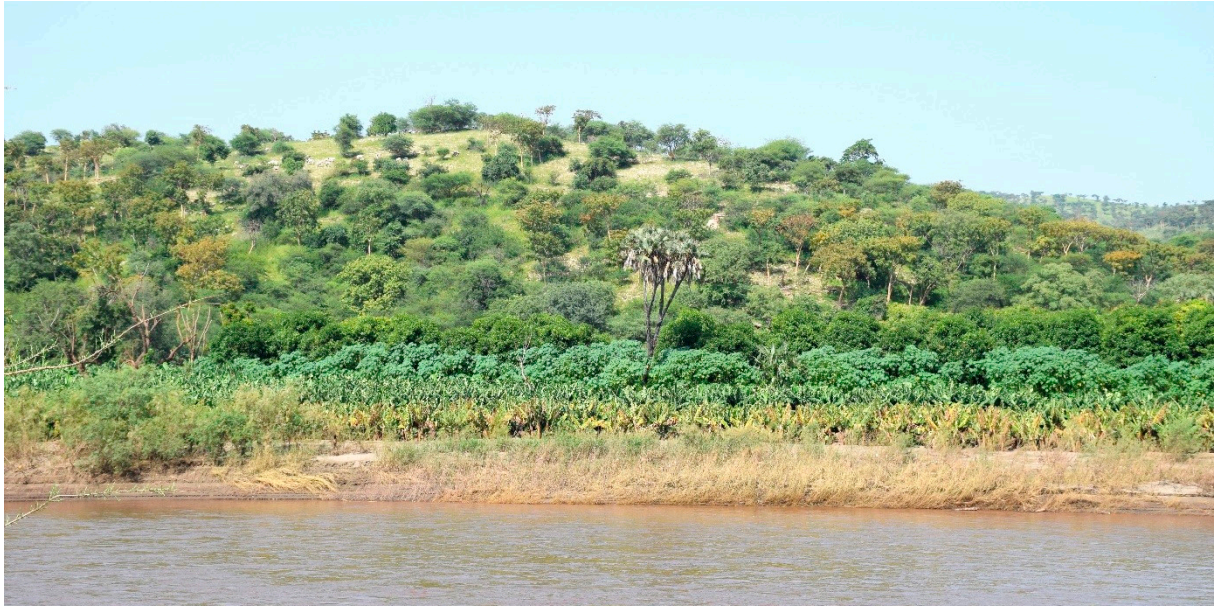

**Figure 3** Banana plants damaged by the 2018 emergency dam release: the yellow-colored plants will die and need to be replaced. The water levels remained high for up to fifteen days and thick layers of sand have been deposited.
